# Supplementary material
Source: MDPI journal article supplement (https://www.mdpi.com/2673-4591/37/1/15)
Supplement: s1 [file s1]

# Rational Selection of Transition Metal Co-dopant in Sulfur-doped Titanium Dioxide

Edgar Clyde R. Lopez <sup>1,2</sup>

<sup>1</sup> Nanotechnology Research Laboratory, Department of Chemical Engineering, University of the Philippines, Quezon City 1101, Philippines; edgarclodelopez09@gmail.com

<sup>2</sup> Chemical Engineering Department, Adamson University, Manila 1000, Philippines

**Table S1.** Effect of various transition metals on the properties of TM-doped titanium dioxide.

| Dopant | Lattice Parameters |       |       | Volume  | Total Energy | Density | Relative Volume Difference | Relative Energy Difference | Relative Density Difference |
|--------|--------------------|-------|-------|---------|--------------|---------|----------------------------|----------------------------|-----------------------------|
|        | a                  | b     | c     |         |              |         |                            |                            |                             |
|        | Å                  | Å     | Å     |         |              |         |                            |                            |                             |
| Sc     | 7.575              | 7.569 | 8.618 | 494.069 | 2471.883     | 4.287   | 99.8805                    | 105.2505                   | 99.8891                     |
| Ti     | 7.623              | 7.623 | 8.512 | 494.660 | 2348.571     | 4.291   | 100.0000                   | 100.0000                   | 100.0000                    |
| V      | 7.538              | 7.546 | 8.606 | 489.449 | 2516.600     | 4.347   | 98.9466                    | 107.1545                   | 101.3051                    |
| Cr     | 7.620              | 7.620 | 8.484 | 492.641 | 2348.918     | 4.323   | 99.5918                    | 100.0148                   | 100.7365                    |
| Mn     | 7.662              | 7.662 | 8.474 | 497.477 | 2341.802     | 4.291   | 100.5694                   | 99.7118                    | 99.9812                     |
| Fe     | 7.625              | 7.626 | 8.485 | 493.325 | 2342.563     | 4.330   | 99.7302                    | 99.7442                    | 100.8939                    |
| Co     | 7.606              | 7.605 | 8.466 | 489.734 | 2369.146     | 4.372   | 99.0041                    | 100.8761                   | 101.8776                    |
| Ni     | 7.587              | 7.586 | 8.453 | 486.446 | 2398.315     | 4.401   | 98.3395                    | 102.1181                   | 102.5484                    |
| Cu     | 7.569              | 7.573 | 8.534 | 489.119 | 2489.472     | 4.393   | 98.8799                    | 105.9994                   | 102.3706                    |
| Zn     | 7.583              | 7.582 | 8.501 | 488.703 | 2478.755     | 4.403   | 98.7958                    | 105.5431                   | 102.6029                    |

**Table S2.** Effect of various transition metals on the properties of TM/S co-doped titanium dioxide.

| Dopant | Lattice Parameters |       |       | Volume  | Total Energy | Density | Relative Volume Difference | Relative Energy Difference | Relative Density Difference |
|--------|--------------------|-------|-------|---------|--------------|---------|----------------------------|----------------------------|-----------------------------|
|        | a                  | b     | c     |         |              |         |                            |                            |                             |
|        | Å                  | Å     | Å     |         |              |         |                            |                            |                             |
| Sc     | 7.588              | 7.651 | 8.720 | 506.239 | 2493.499     | 4.2363  | 100.4410                   | 104.8460                   | 99.3345                     |
| Ti     | 7.614              | 7.685 | 8.615 | 504.016 | 2378.248     | 4.2646  | 100.0000                   | 100.0000                   | 100.0000                    |
| V      | 7.557              | 7.618 | 8.711 | 501.372 | 2530.647     | 4.2972  | 99.4753                    | 106.4080                   | 100.7637                    |
| Cr     | 7.606              | 7.677 | 8.587 | 501.389 | 2376.402     | 4.3006  | 99.4788                    | 99.9224                    | 100.8421                    |
| Mn     | 7.617              | 7.689 | 8.592 | 503.145 | 2366.379     | 4.2953  | 99.8271                    | 99.5009                    | 100.7178                    |
| Fe     | 7.611              | 7.683 | 8.587 | 502.143 | 2370.736     | 4.3068  | 99.6283                    | 99.6841                    | 100.9893                    |
| Co     | 7.587              | 7.659 | 8.569 | 497.923 | 2393.718     | 4.3536  | 98.7911                    | 100.6505                   | 102.0865                    |
| Ni     | 7.565              | 7.637 | 8.554 | 494.145 | 2419.922     | 4.3862  | 98.0416                    | 101.7523                   | 102.8494                    |
| Cu     | 7.584              | 7.644 | 8.633 | 500.476 | 2499.966     | 4.3467  | 99.2976                    | 105.1180                   | 101.9246                    |
| Zn     | 7.595              | 7.655 | 8.594 | 499.655 | 2487.881     | 4.3600  | 99.1347                    | 104.6098                   | 102.2350                    |

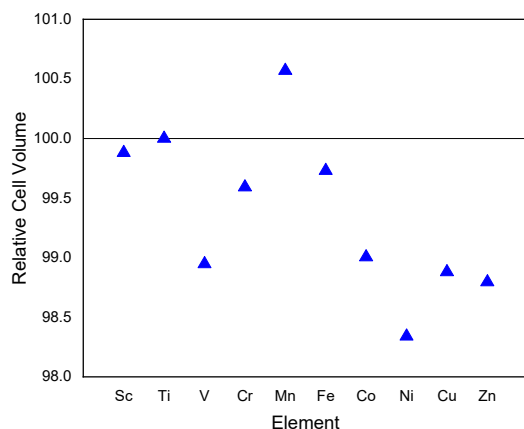

(a)

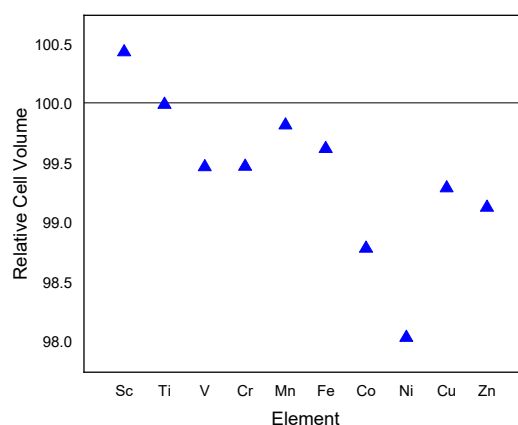

(b)

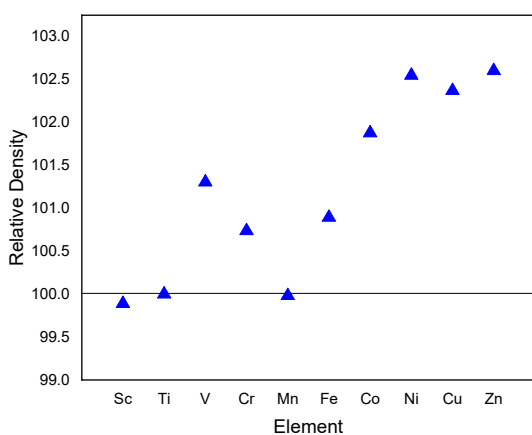

(c)

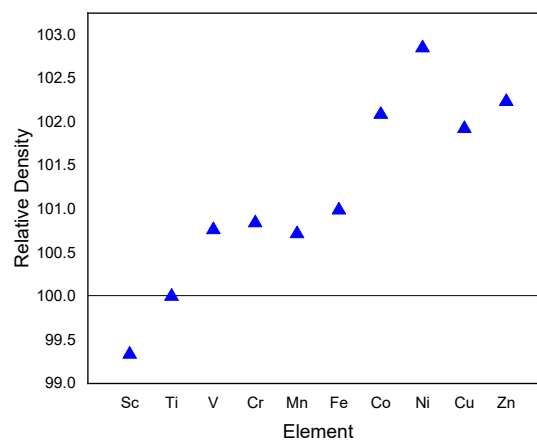

(d)

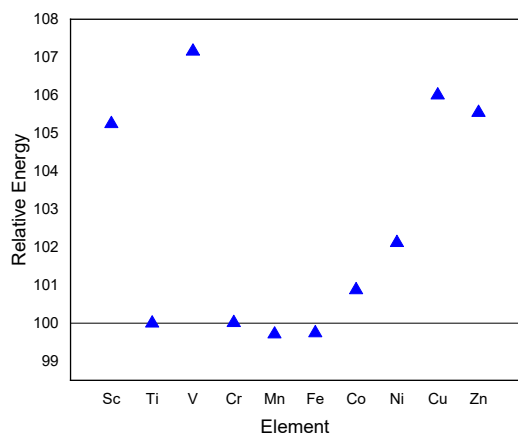

(e)

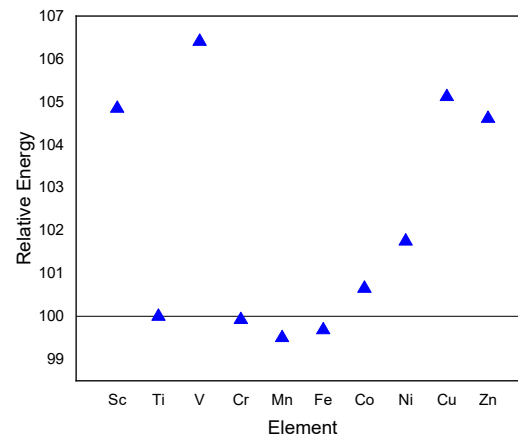

(f)

**Figure S1** Calculated cell volume differences of (a) TM-doped  $\text{TiO}_2$  relative to pristine  $\text{TiO}_2$  and (b) TM/S co-doped  $\text{TiO}_2$  relative to S-doped  $\text{TiO}_2$ ; Calculated density differences of (c) TM-doped  $\text{TiO}_2$  relative to pristine  $\text{TiO}_2$  and (d) TM/S co-doped  $\text{TiO}_2$  relative to S-doped  $\text{TiO}_2$ ; and Calculated energy differences of (e) TM-doped  $\text{TiO}_2$  relative to pristine  $\text{TiO}_2$  and (f) TM/S co-doped  $\text{TiO}_2$  relative to S-doped  $\text{TiO}_2$ .

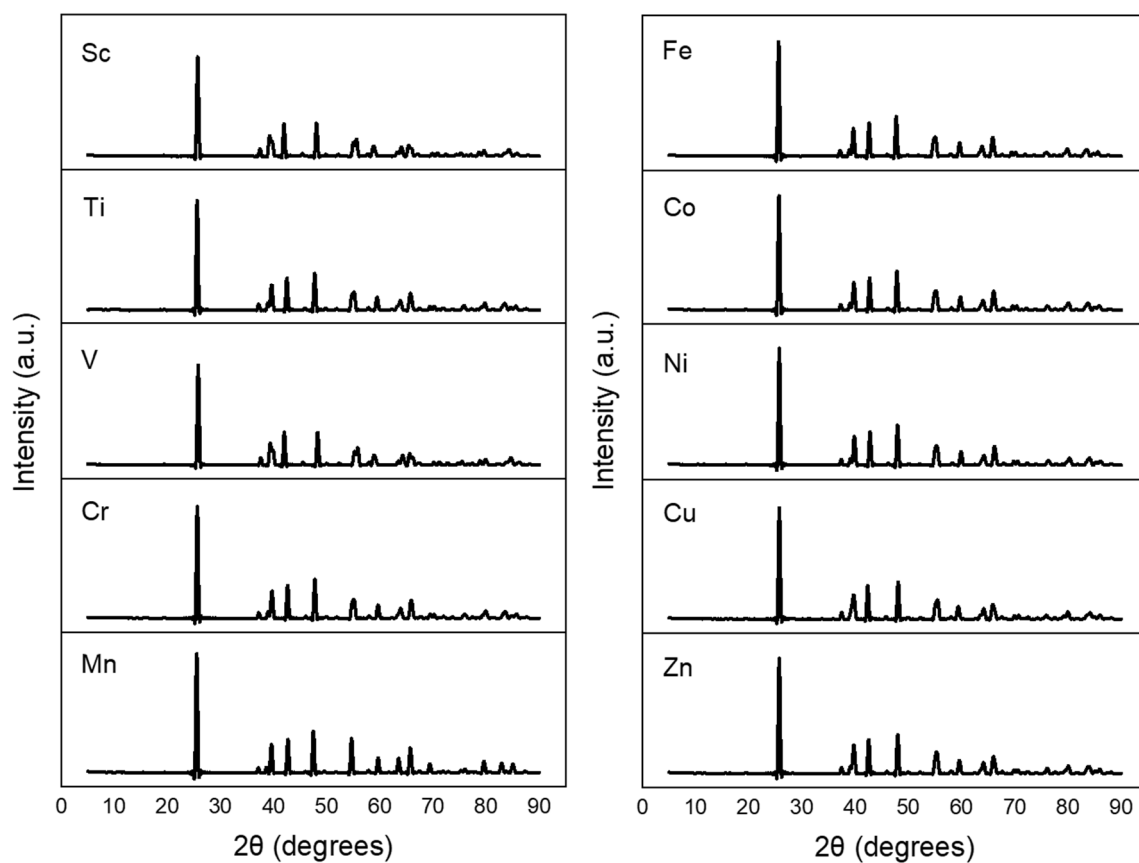

**Figure S2.** Simulated XRD profiles of various TM-doped  $\text{TiO}_2$ .

**Table S3.** Effect of various transition metals on the crystallinity of TM-doped titanium dioxide.

| Co-dopant | Degree of Crystallinity | Relative Difference vs. S- $\text{TiO}_2$ |
|-----------|-------------------------|-------------------------------------------|
| Sc        | 64.14                   | 117.93                                    |
| Ti        | 54.39                   | 100.00                                    |
| V         | 65.13                   | 119.75                                    |
| Cr        | 54.14                   | 99.54                                     |
| Mn        | 55.02                   | 101.16                                    |
| Fe        | 53.54                   | 98.44                                     |
| Co        | 54.13                   | 99.52                                     |
| Ni        | 53.62                   | 98.58                                     |
| Cu        | 56.25                   | 103.42                                    |
| Zn        | 54.76                   | 100.68                                    |

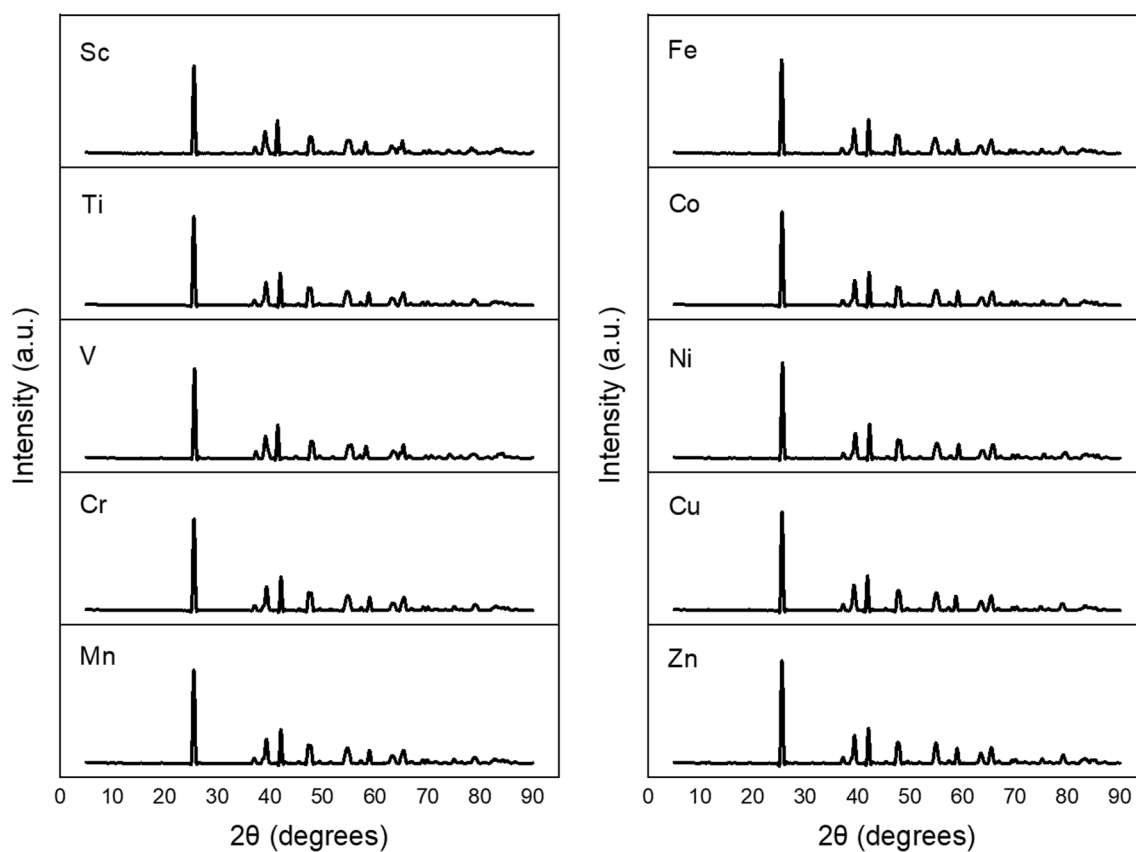

**Figure S3.** Simulated XRD profiles of various TM/S co-doped  $\text{TiO}_2$ .

**Table S4.** Effect of various transition metals on the crystallinity of TM/S co-doped titanium dioxide.

| Co-dopant | Degree of Crystallinity | Relative Difference vs. S- $\text{TiO}_2$ |
|-----------|-------------------------|-------------------------------------------|
| Sc        | 62.43                   | 99.05                                     |
| Ti        | 63.03                   | 100.00                                    |
| V         | 64.16                   | 101.79                                    |
| Cr        | 64.08                   | 101.67                                    |
| Mn        | 63.35                   | 100.51                                    |
| Fe        | 63.39                   | 100.57                                    |
| Co        | 64.13                   | 101.75                                    |
| Ni        | 64.92                   | 103.00                                    |
| Cu        | 64.85                   | 102.89                                    |
| Zn        | 66.56                   | 105.60                                    |

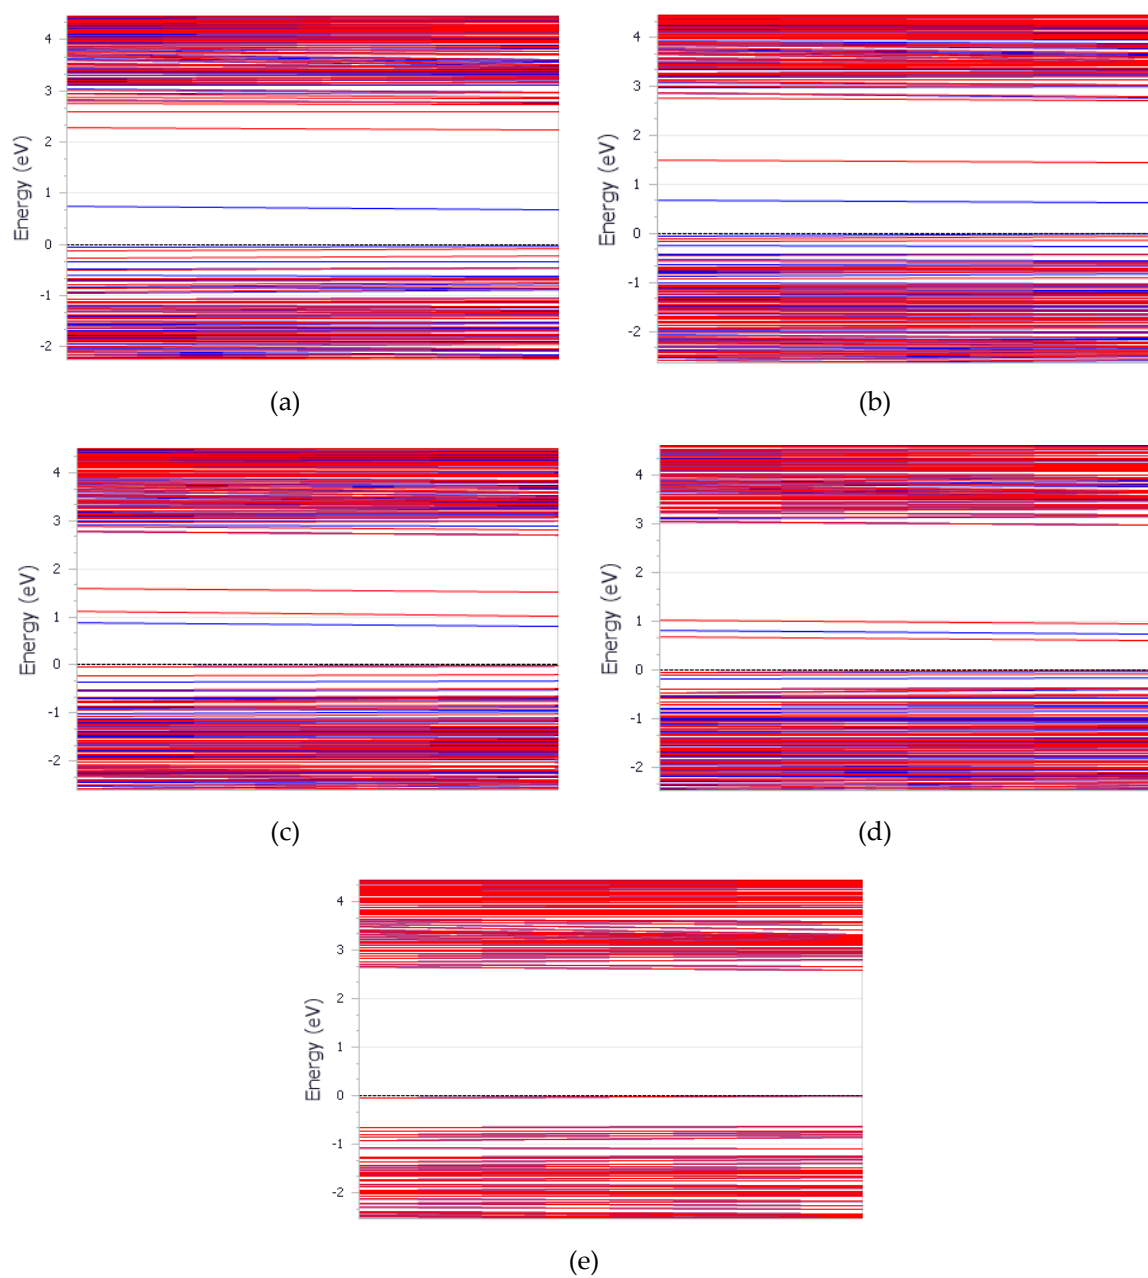

**Figure S4.** Electronic structure of: (a) Fe/S-TiO<sub>2</sub>, (b) Co/S-TiO<sub>2</sub>, (c) Ni/S-TiO<sub>2</sub>, (d) Cu/S-TiO<sub>2</sub>, and (e) S-TiO<sub>2</sub>.

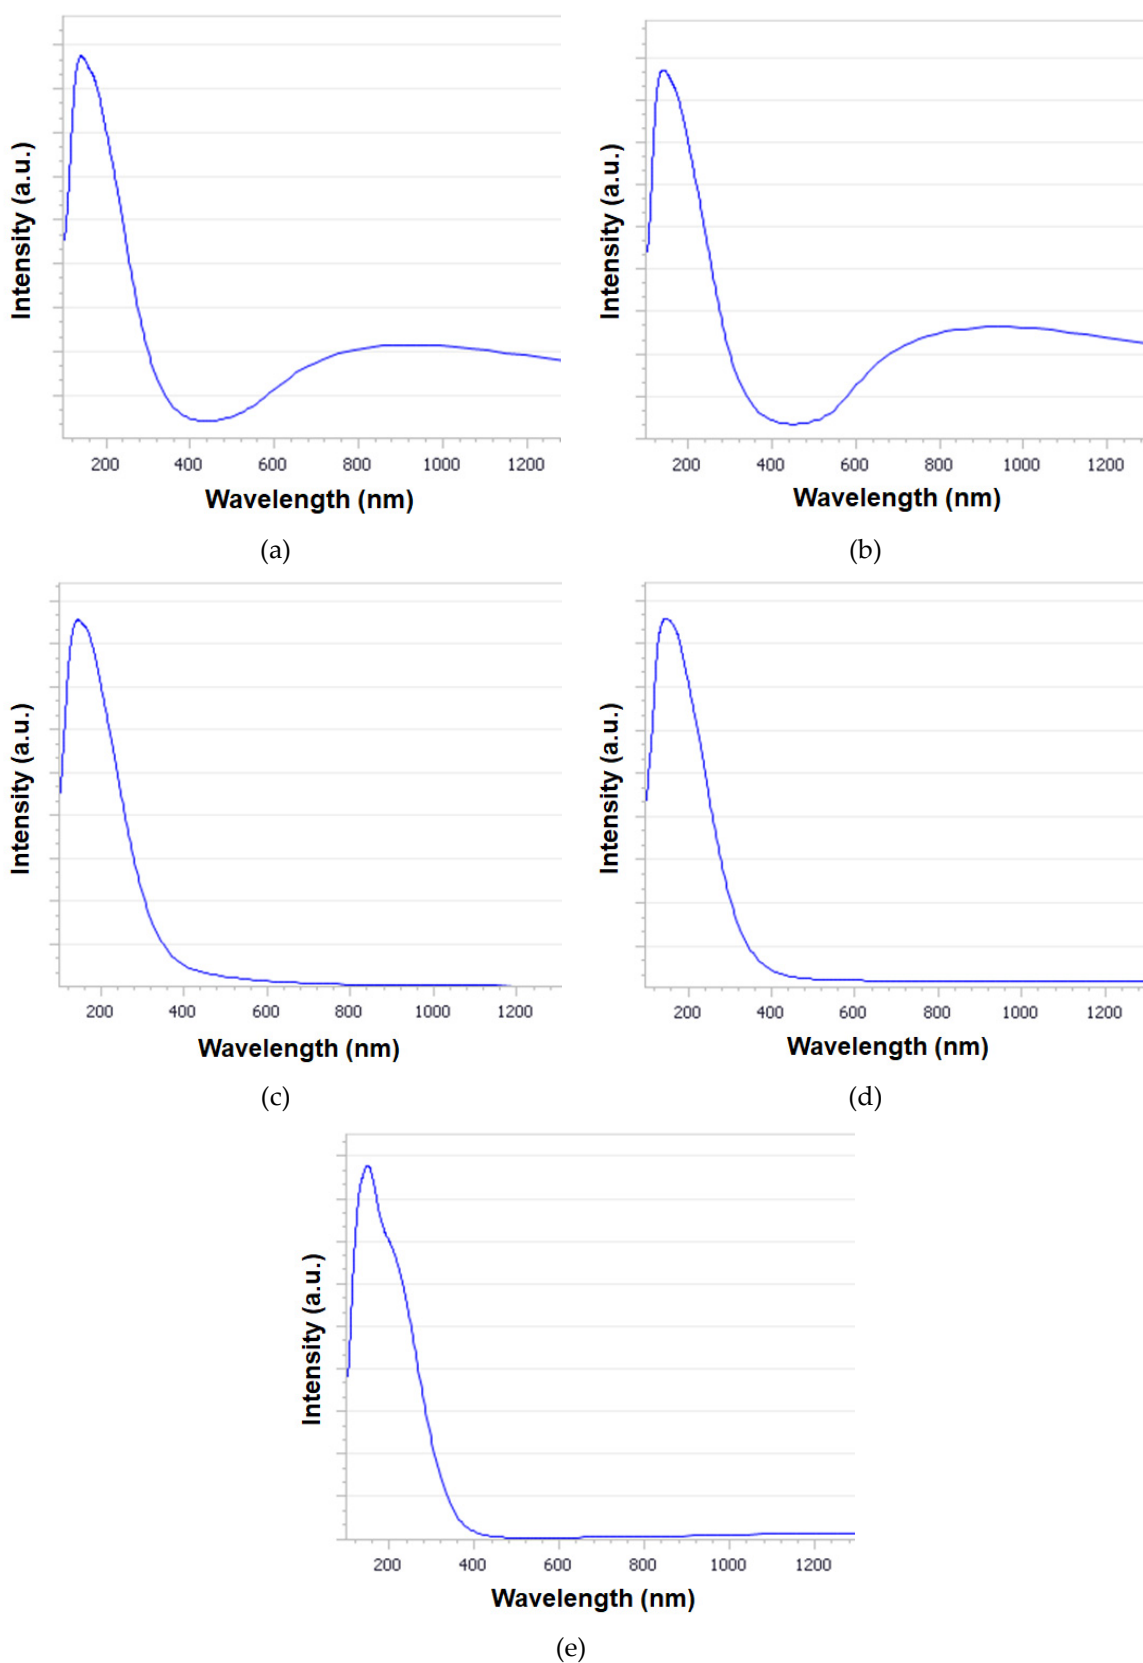

**Figure S5.** Optical absorption spectra of: (a) Fe/S-TiO<sub>2</sub>, (b) Co/S-TiO<sub>2</sub>, (c) Ni/S-TiO<sub>2</sub>, (d) Cu/S-TiO<sub>2</sub>, and (e) pristine TiO<sub>2</sub>.

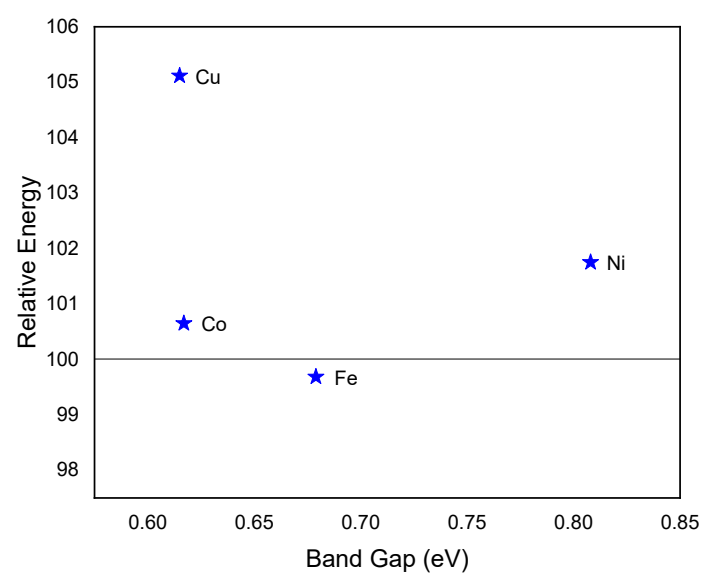

**Figure S6.** Volcano plot of late transition metals and sulfur co-doped TiO<sub>2</sub>.
